# Supplementary material
Source: Springer Nature journal article supplement (https://www.springermedizin.de/resource/supplementary/13058_2010_9509_MOESM11_ESM.pdf/9702290)

**T47-DERβ**

5 days

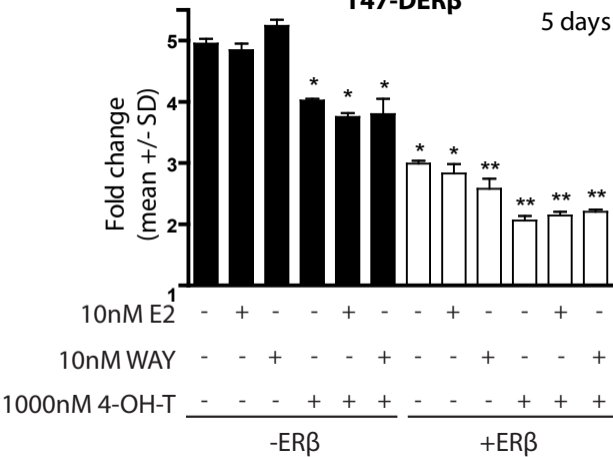**MCF-7ERβ**

7 days

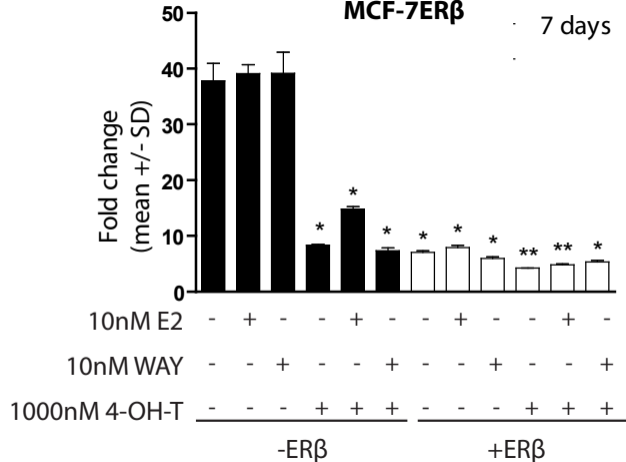

Supplement: MOESM11 [file 9702290]
